# Supplementary material
Source: MDPI journal article supplement (https://www.mdpi.com/2073-4441/12/8/2192)
Supplement: s1 [file s1]

# Supplementary Materials for:

Temporal and Spatial Variations of Chlorophyll a Concentration and Eutrophication Assessment (1987-2018) of Donghu Lake in Wuhan Using Landsat Images

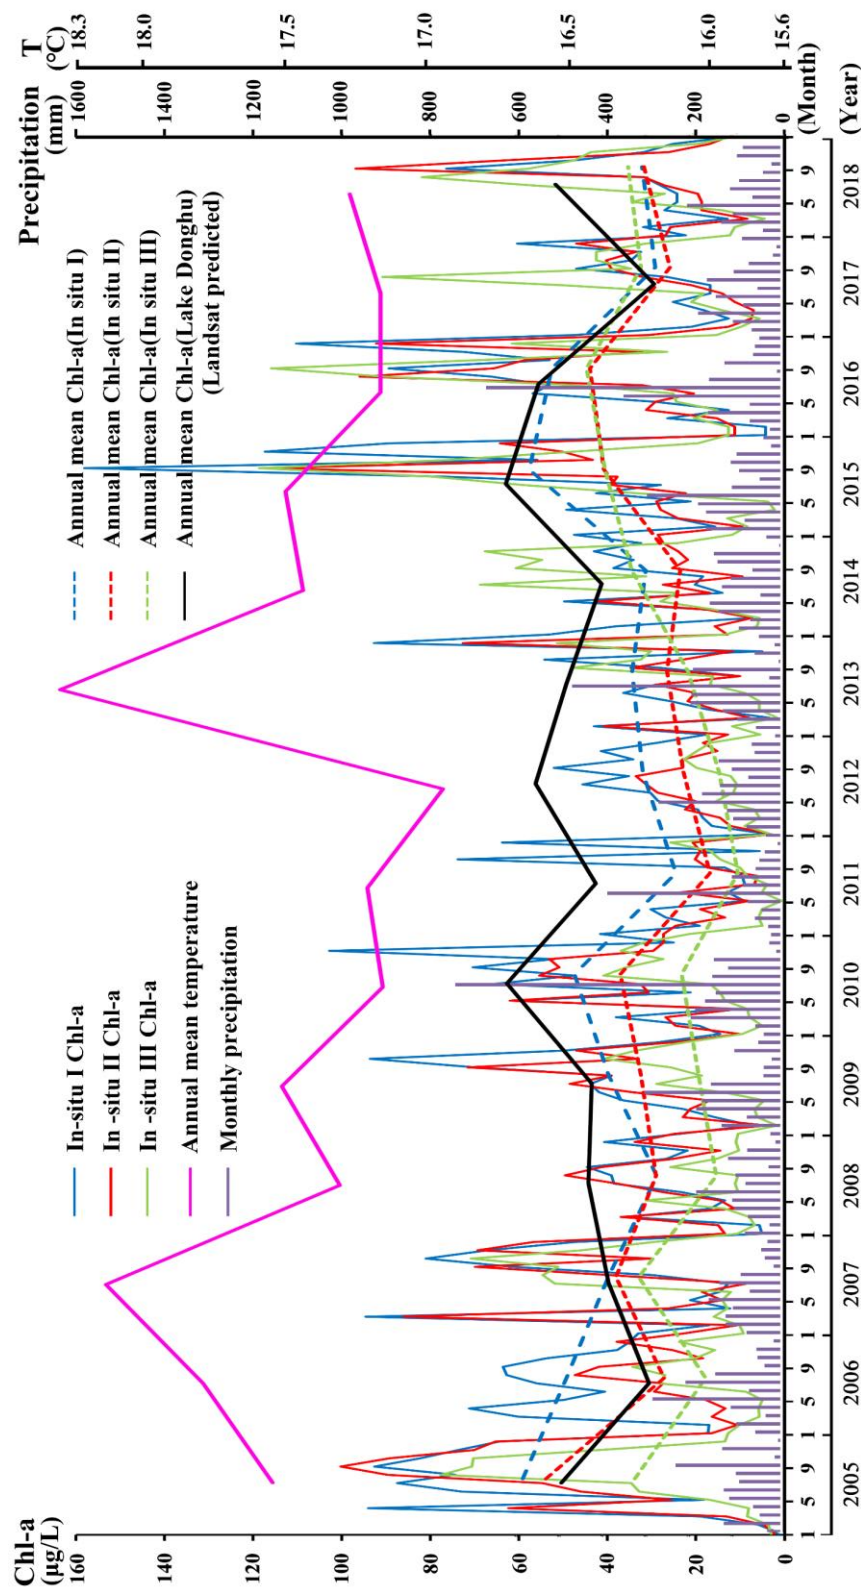

**Figure S1.** Comparison between the observed and predicted Chl-a and meteorological data from 2005-2018.

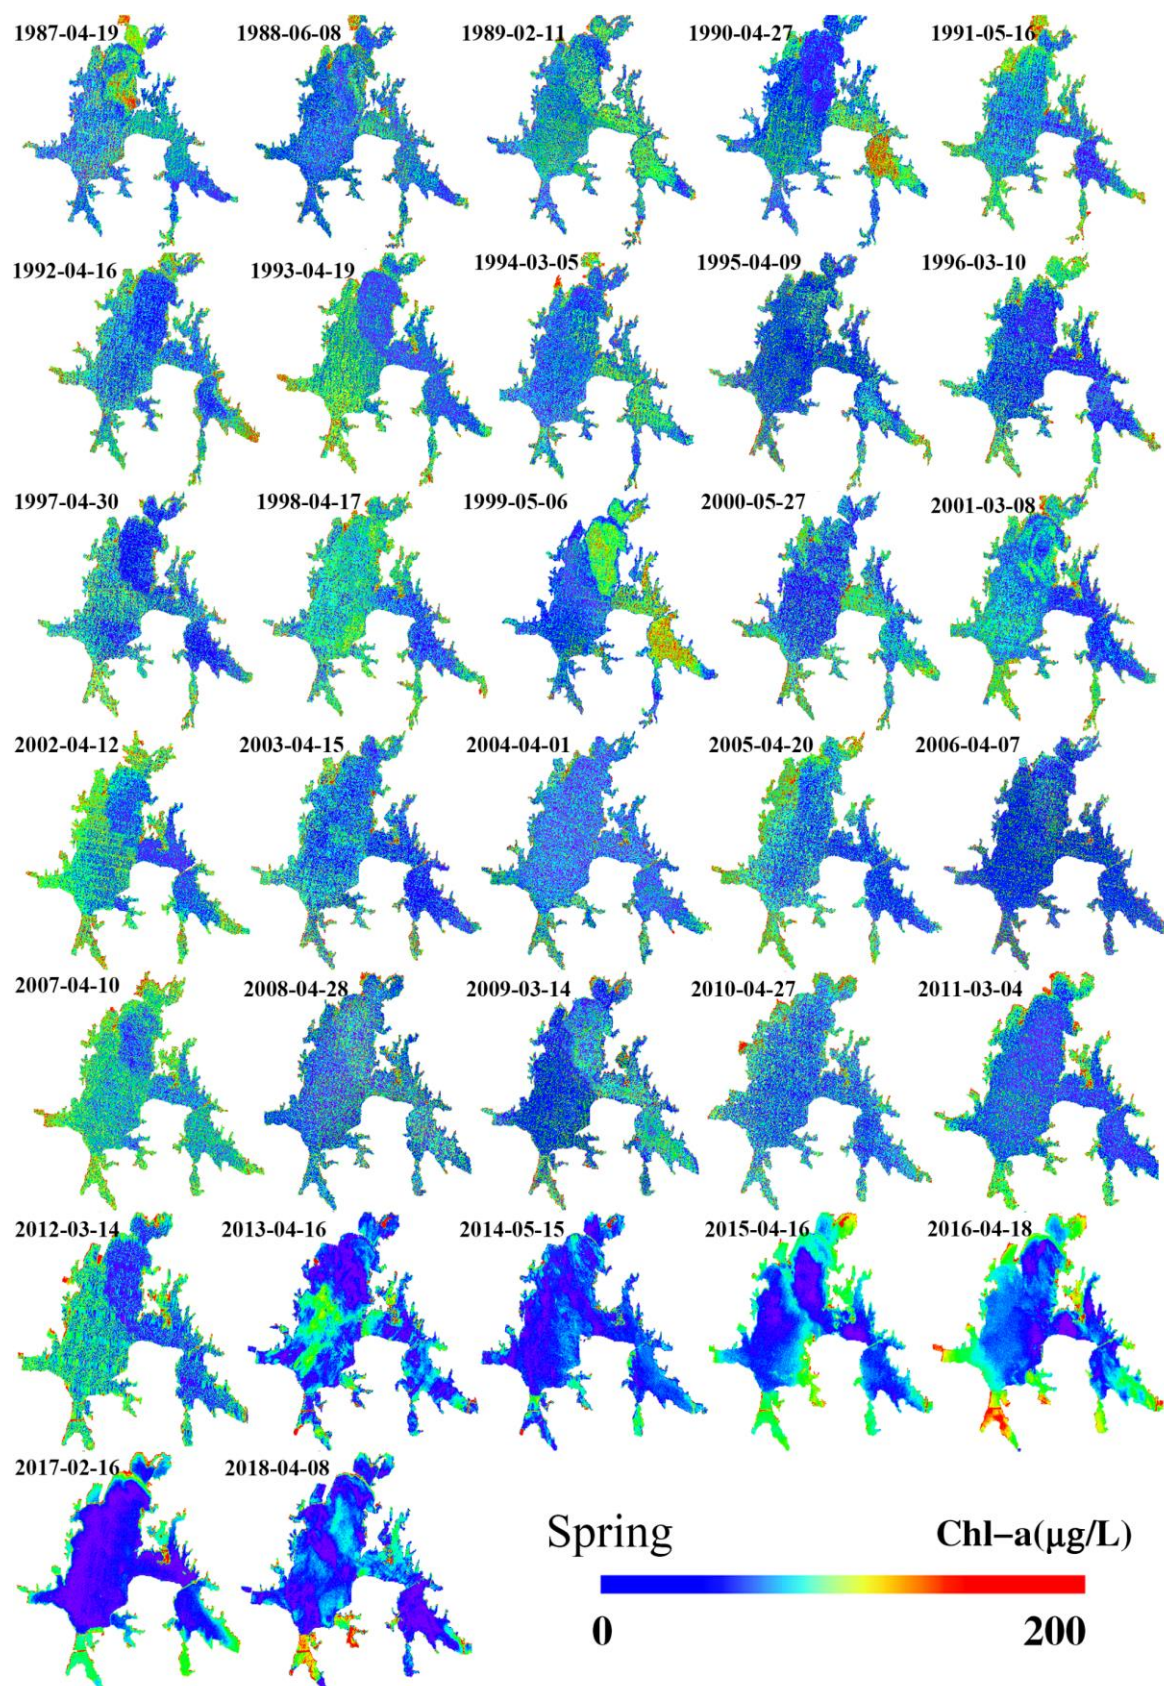



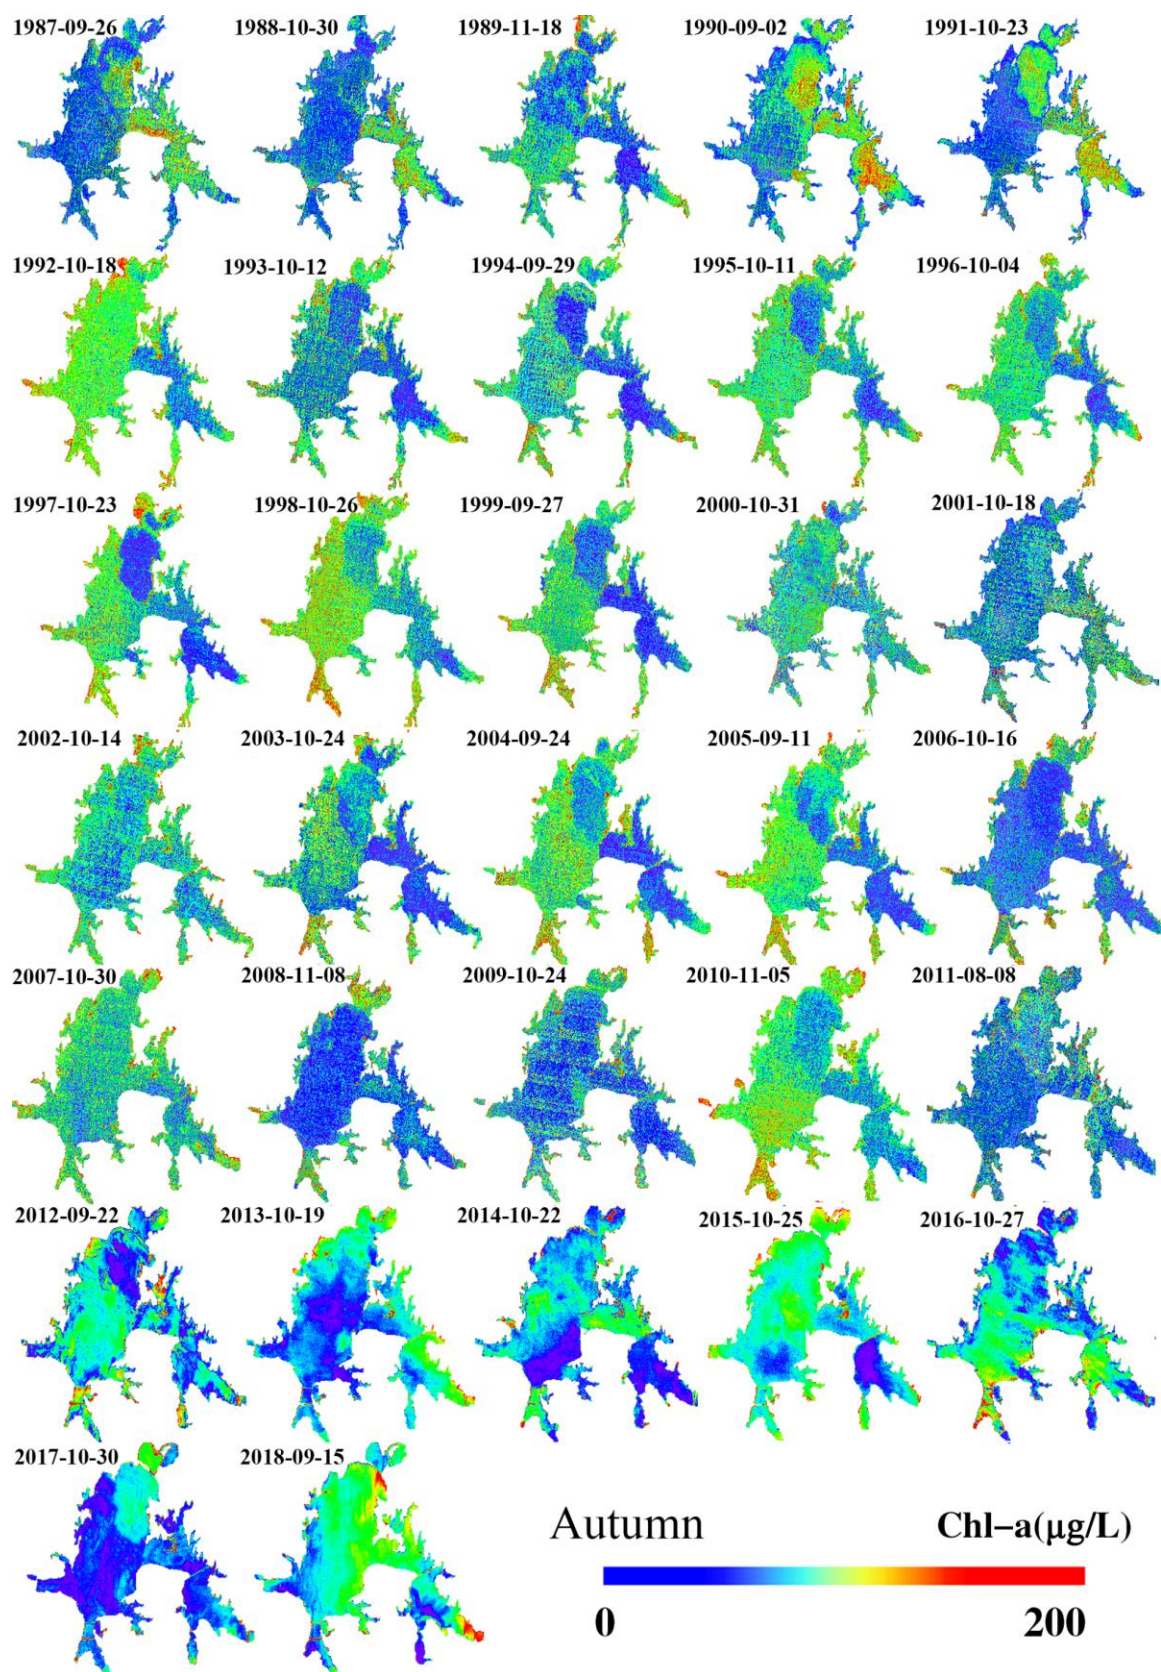

**Figure S2.** Map of predicted Chl-a concentration distribution in the spring and autumn from 1987 to 2018.
